# Supplementary material for: Exploring the binding interaction of rupatadine with bovine serum albumin using multi-spectroscopic and molecular modeling approaches
Source: Research Square preprint supplement (doi:10.21203/rs.3.rs-7321587/v1), 2025-09-02
Supplement: Supplementary file 1 [file 136b9e6d73a6460d56cce1fc.docx]

**Exploring the binding interaction of rupatadine with bovine serum albumin using multi-spectroscopic and molecular modeling approaches**

**Heba Abo Shamiya1, Heba Elmansi1, Shahenda M. El-messery2, Fathalla Belal1**

1 Department of Pharmaceutical Analytical Chemistry, Faculty of Pharmacy, Mansoura University, 35516 Mansoura, Egypt

2 Department of Pharmaceutical Organic Chemistry, Faculty of Pharmacy, Mansoura University, 35516 Mansoura, Egypt

Tel.: ++20502247496 Fax: ++20502247496 e-mail: [boshamiyaheba@gmail.com](mailto:boshamiyaheba@gmail.com)

Supplementary Figures:

Figure S1: The Modified Stern–Volmer plot for BSA-RUPA at various temperatures.

Figure S2: Synchronous fluorescence of BSA-RUPA complex at ∆λ=15 (A) and ∆λ=60 (B) with increasing the concentration of RUPA (0.00-100µM) and 2µM of BSA at pH 7.4 at 303 K.

Figure S3: (a) Free BSA FTIR spectra at 303 K at pH 7.4.

(b) BSA-RUPA complex FTIR spectra at 303 K at pH 7.4.

Figure S4: Lowest energy conformer of compound Rupatadine with balls and cylinders rendering

Figure S5: (a) The 2D binding mode and residues involved in the recognition for Rupatadine

(b) 3D binding view of Rupatadine embedded into the surface mapping pocket. Pink: hydrogen bond, blue: mild polar, green: hydrophobic region.

Figure S6: Surface map for Rupatadine, Pink: hydrogen bond, blue: mild polar, green: hydrophobic region.

**Figure S1**


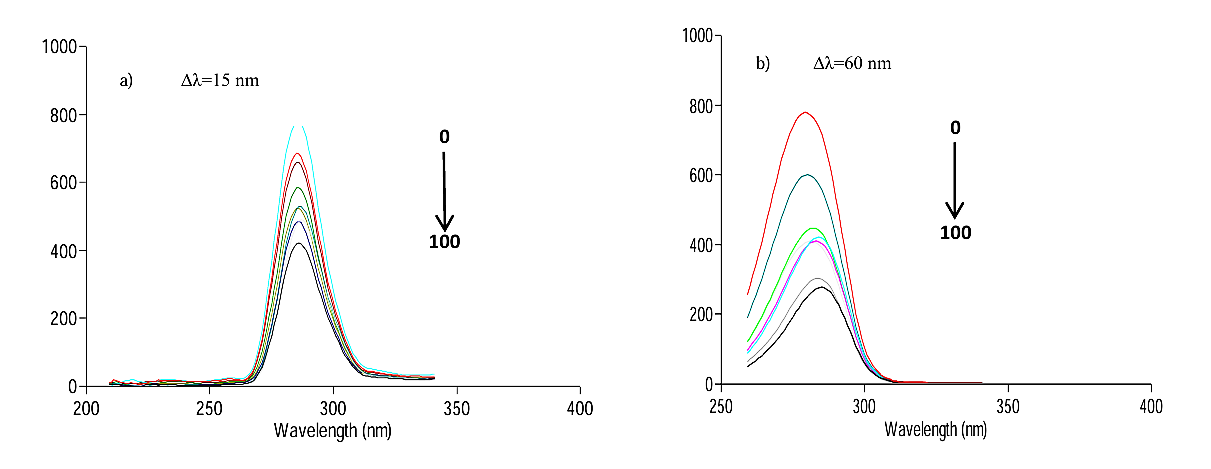


Fluorescence Intensity (a.u.)

Fluorescence Intensity (a.u.)

**Figure S2**


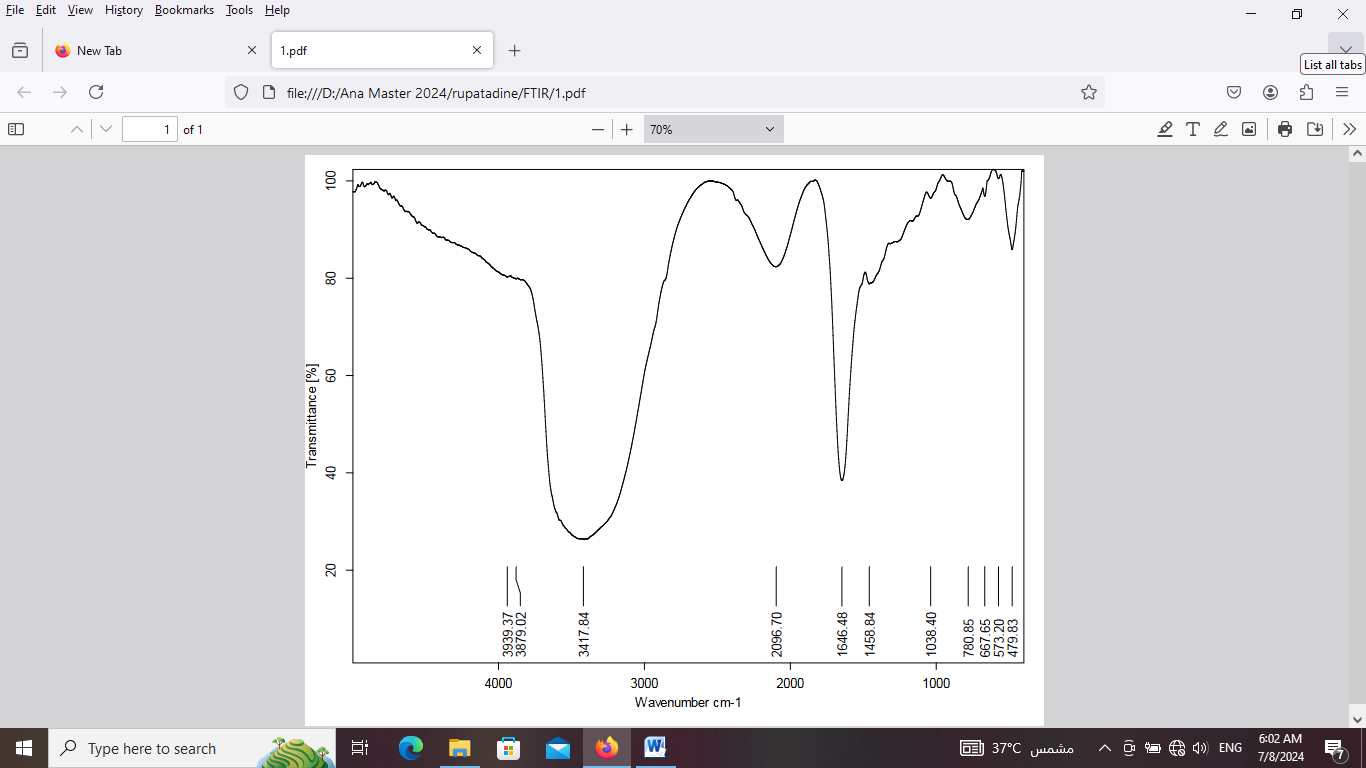

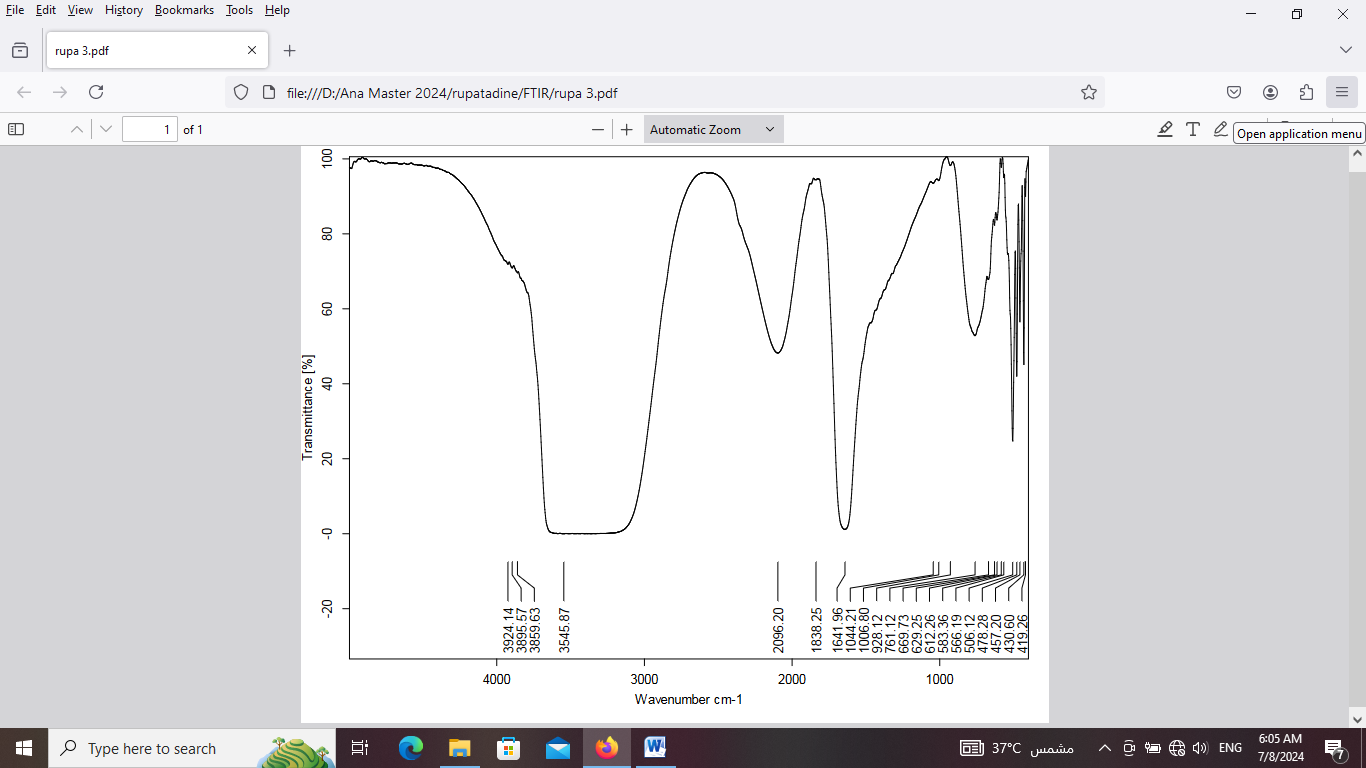


**Figure S3**


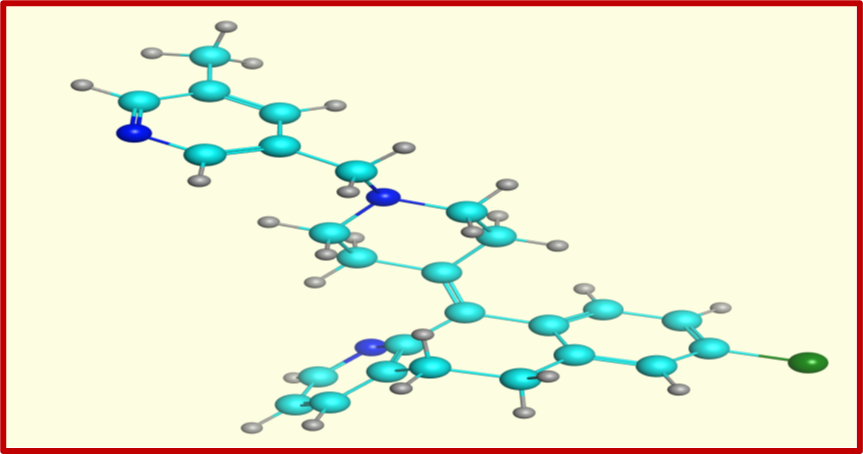


**Figure S4**


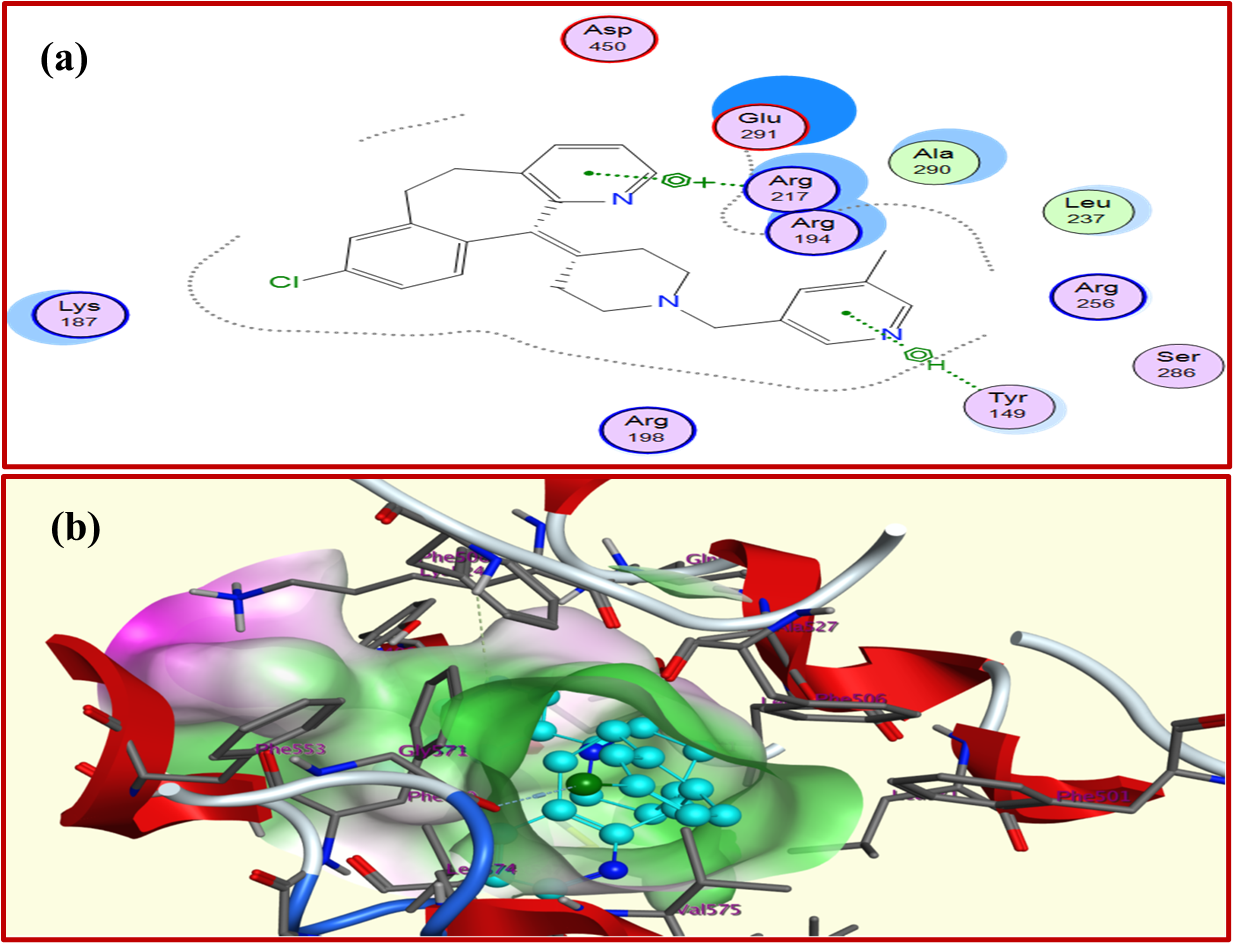


**Figure S5**


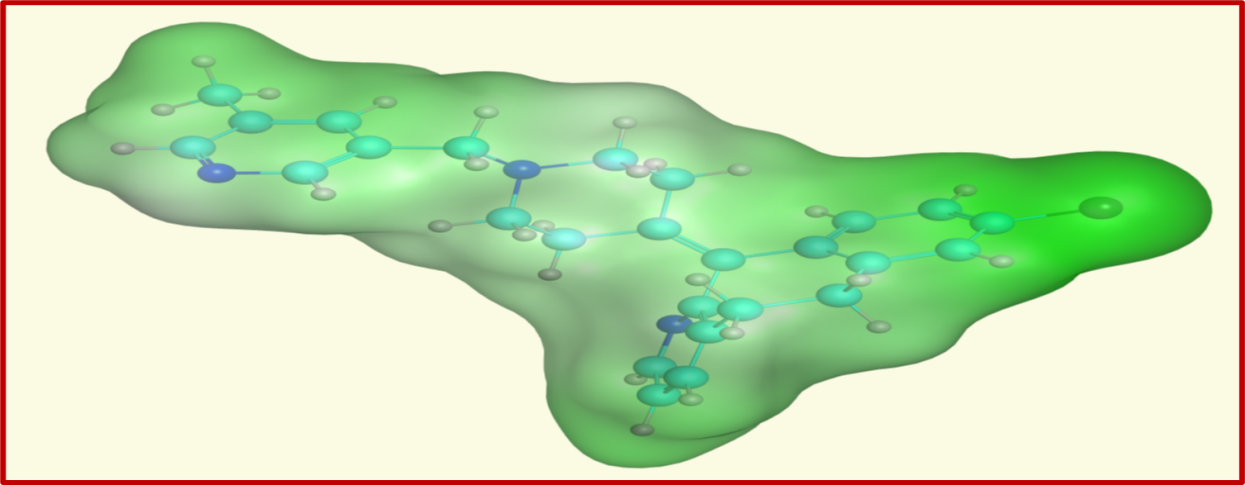


**Figure S6**
